# Supplementary material for: Spatial and Temporal Analysis of Impacts of Hurricane Florence on Criteria Air Pollutants and Air Toxics in Eastern North Carolina
Source: MDPI journal article supplement (doi:10.3390/ijerph19031757), 2022-02-03
Supplement: s1 [file s1]

# **Spatial and temporal analysis of impacts of Hurricane Florence on criteria air pollutants and air toxics in Eastern North Carolina**

## **Supplemental Materials**

Sharmila Bhandari<sup>1,2</sup>, Gaston Casillas<sup>2</sup>, Noor A. Aly<sup>1,2</sup>, Rui Zhu<sup>3</sup>, Galen Newman<sup>3</sup>, Fred A. Wright<sup>4</sup>, Anthony Miller<sup>5</sup>, Gabriela Adler<sup>6</sup>, Ivan Rusyn<sup>1,2</sup>, Weihsueh A. Chiu<sup>1,2,\*</sup>

<sup>1</sup>Department of Veterinary Integrative Biosciences, <sup>2</sup>Interdisciplinary Faculty of Toxicology, and <sup>3</sup>Department of Landscape Architecture and Urban Planning, Texas A&M University, College Station, Texas, 77845, USA

<sup>4</sup>Bioinformatics Research Center, and Departments of Statistics and Biological Sciences, North Carolina State University, Raleigh, North Carolina, 27695, USA

<sup>5</sup>Entanglement Technologies San Bruno CA 94066, USA

<sup>6</sup>Breezometer, Haifa, 3303124 Israel

## **1. Supplementary data**

Original data as well as clustered data are provided separately as Excel spreadsheets.

Original data: Supplementary data\_original.xlsx

- These consist of the original mobile sampling data as collected during each sampling campaign, as described in Methods Section 2.2.

Clustered data: Supplementary data\_clusteranalysis.xlsx

- These consist of both the mobile sampling data, clustered by location/timepoint as described in Methods Section 2.5, as well as the corresponding modeled criteria air pollution predictions at the corresponding location/timepoint (Methods Section 2.3).

## 2. Supplementary Tables

**Table S1. QA/QC Summary of Mobile Air Quality Sampling**

|                                            | September<br>2018 | January<br>2019 | May<br>2019 |
|--------------------------------------------|-------------------|-----------------|-------------|
| Total Analysis Runs                        | 133               | 103             | 123         |
| CCV Measurements                           | 6                 | 5               | 6           |
| QA/QC Automatically Flagged Fit<br>results | 22                | 58              | 8           |
| Cleared in post-analysis                   | 22                | 27              | 4           |
| CCV Failures (initial)                     | 0                 | 0               | 4           |
| CCV Failures After Re-calibration          | 0                 | 0               | 1           |

### 3. Supplementary Figures

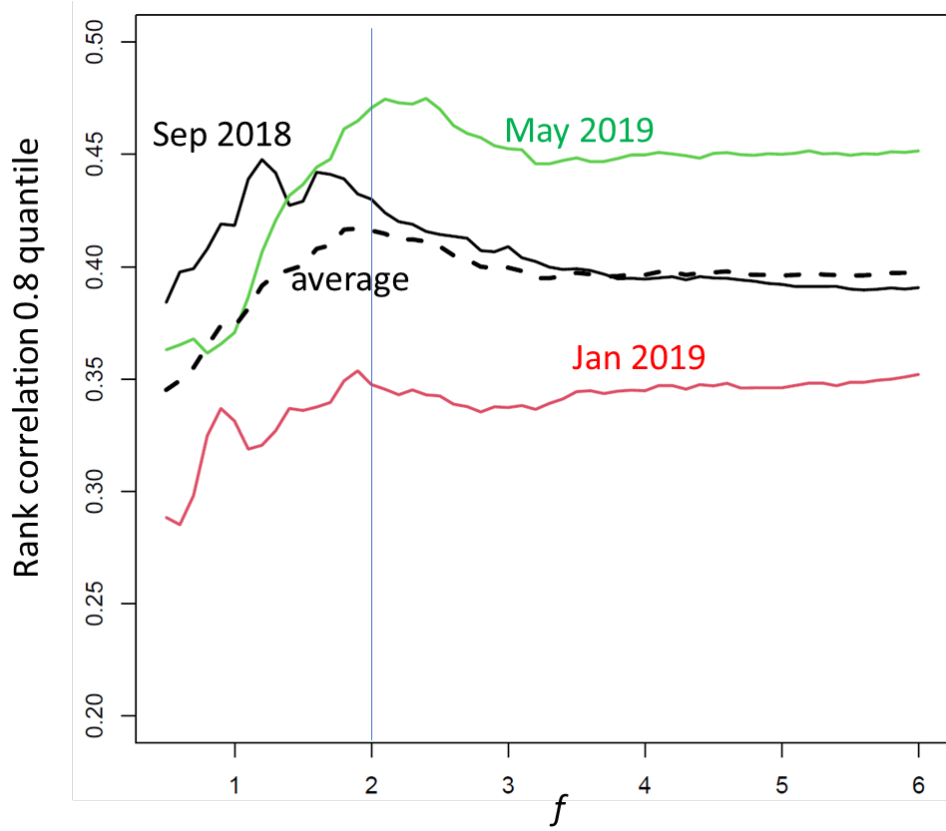

**Figure S1.** For each monthly dataset, pollutant and power law value  $f$ , the rank correlation  $r$  was computed between the pollutant concentration and the summed inverse distance values from fuel stations, as described in the text. To account for the possibility that only a fraction of pollutants reflects true association, the 0.8 quantile of the  $r$  values across pollutants, within each dataset, was used as an index to demonstrate the varying strength of association over different values of  $f$ . Across the power law values  $f$ , a global maximum (or local maximum, for Jan 2019) was achieved in the range 1.2-2.4 (with different peak locations for the three monthly datasets). For parsimony, we considered the average of the three curves across the three monthly datasets, which showed a peak close to  $f=2$ , and this value was then carried forward in later analysis for all datasets and pollutants.

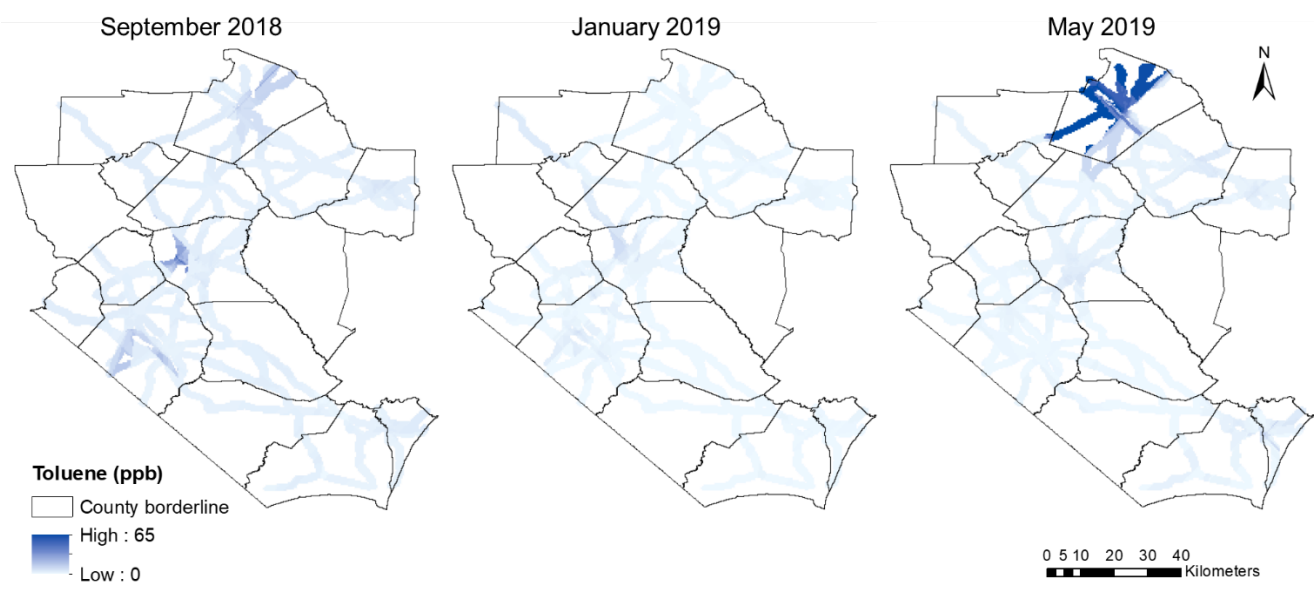

**Figure S2.** Spatial distribution of Toluene for September 2018, January 2019 and May 2019.

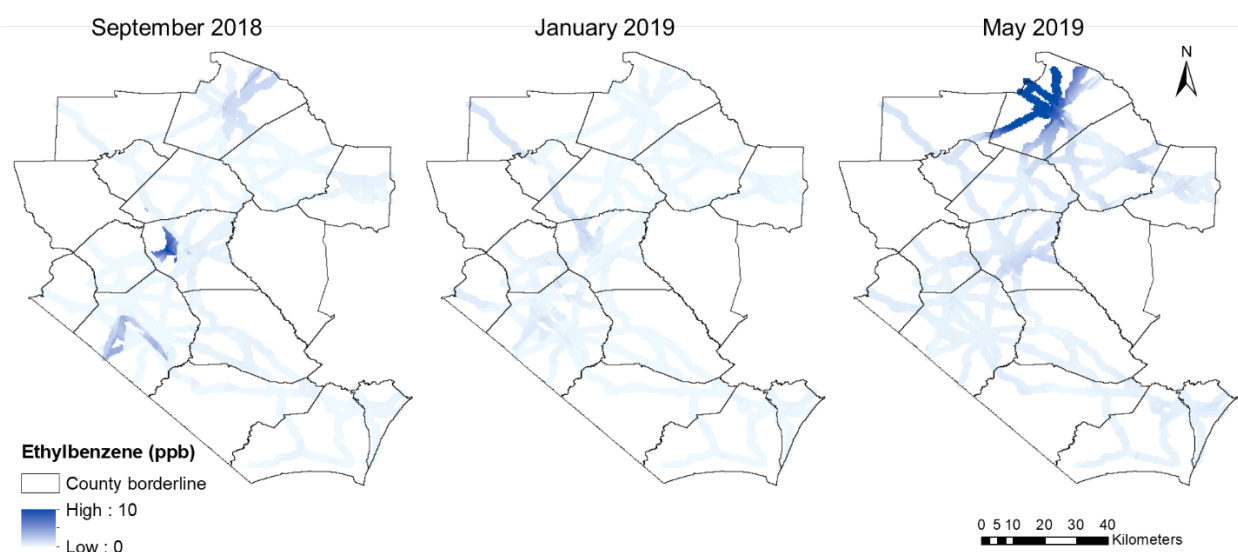

**Figure S3.** Spatial distribution of Ethylbenzene for September 2018, January 2019 and May 2019.

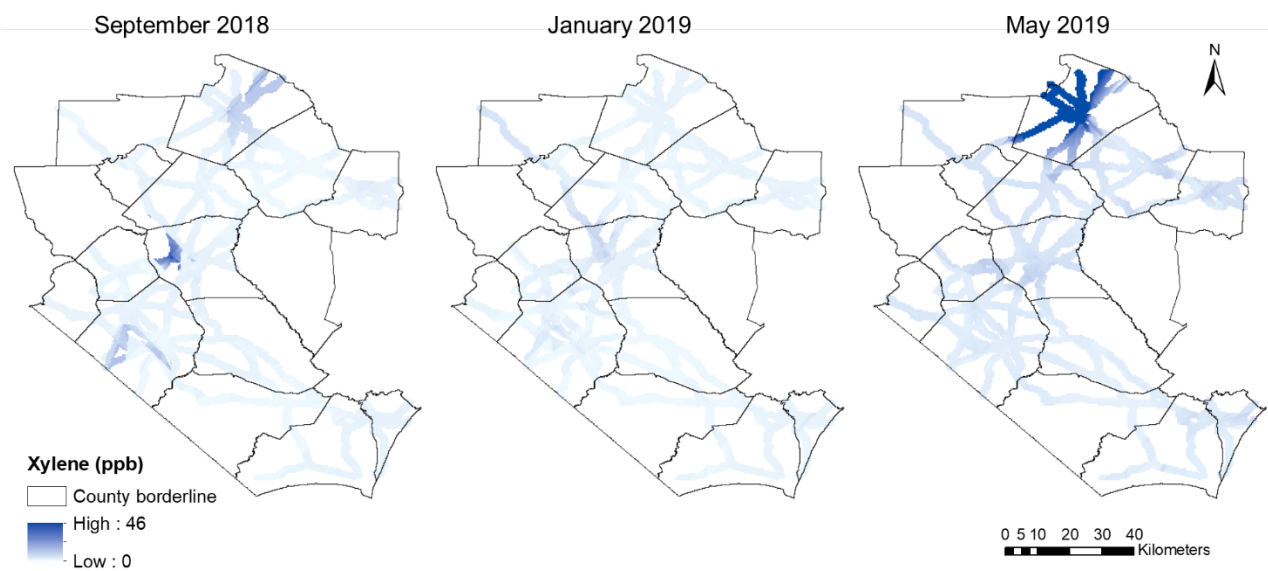

**Figure S4.** Spatial distribution of Xylene for September 2018, January 2019 and May 2019.

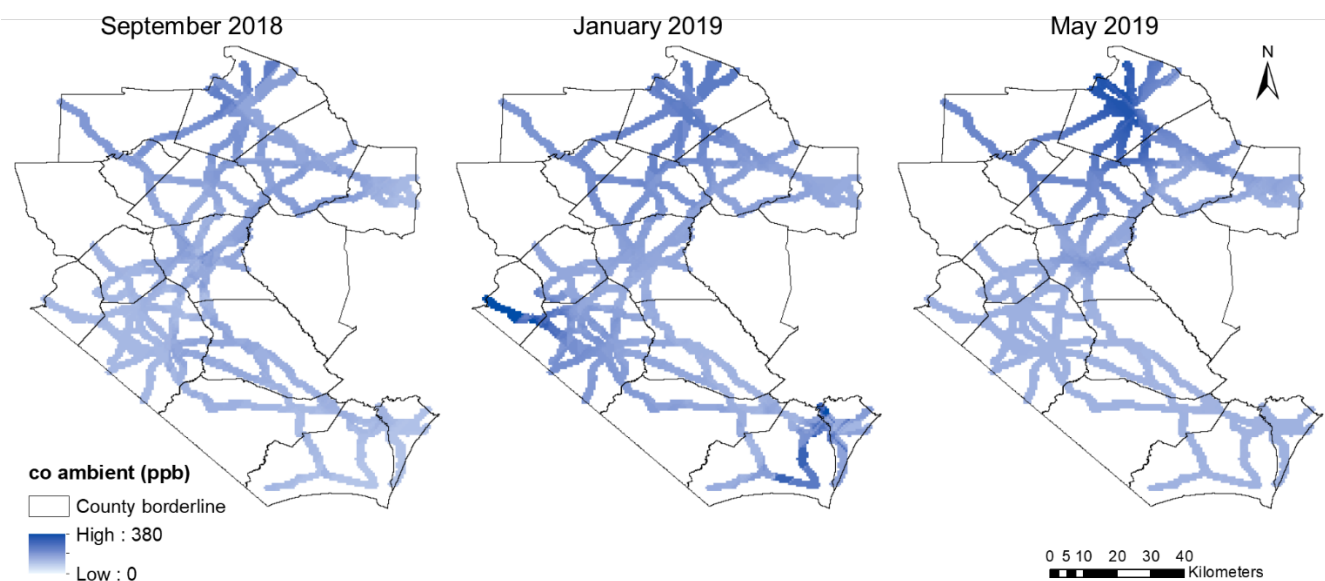

**Figure S5.** Spatial distribution of carbon monoxide (CO) for September 2018, January 2019 and May 2019.



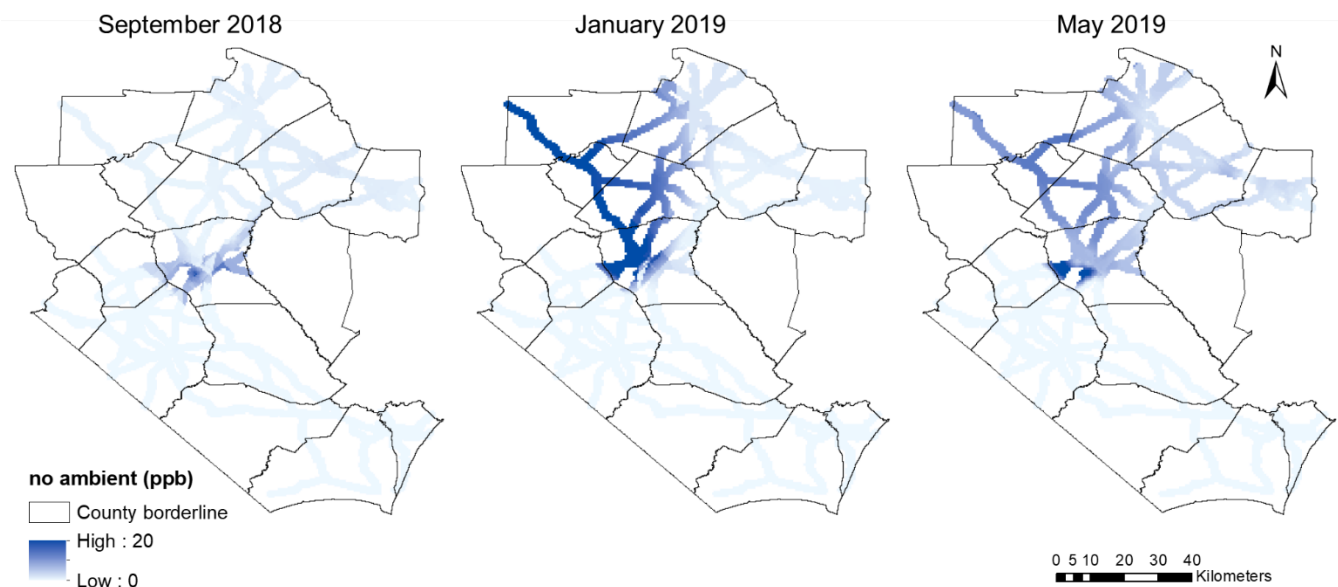

**Figure S6.** Spatial distribution of nitrogen monoxide (NO) for September 2018, January 2019 and May 2019.

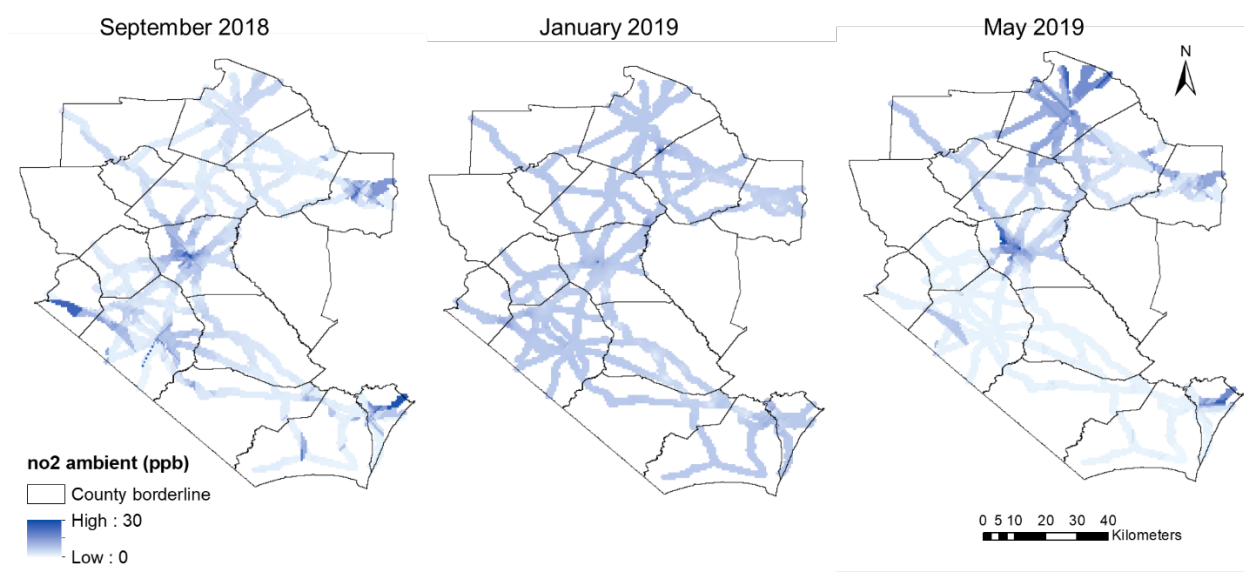

**Figure S7.** Spatial distribution of nitrogen dioxide (NO<sub>2</sub>) for September 2018, January 2019 and May 2019.

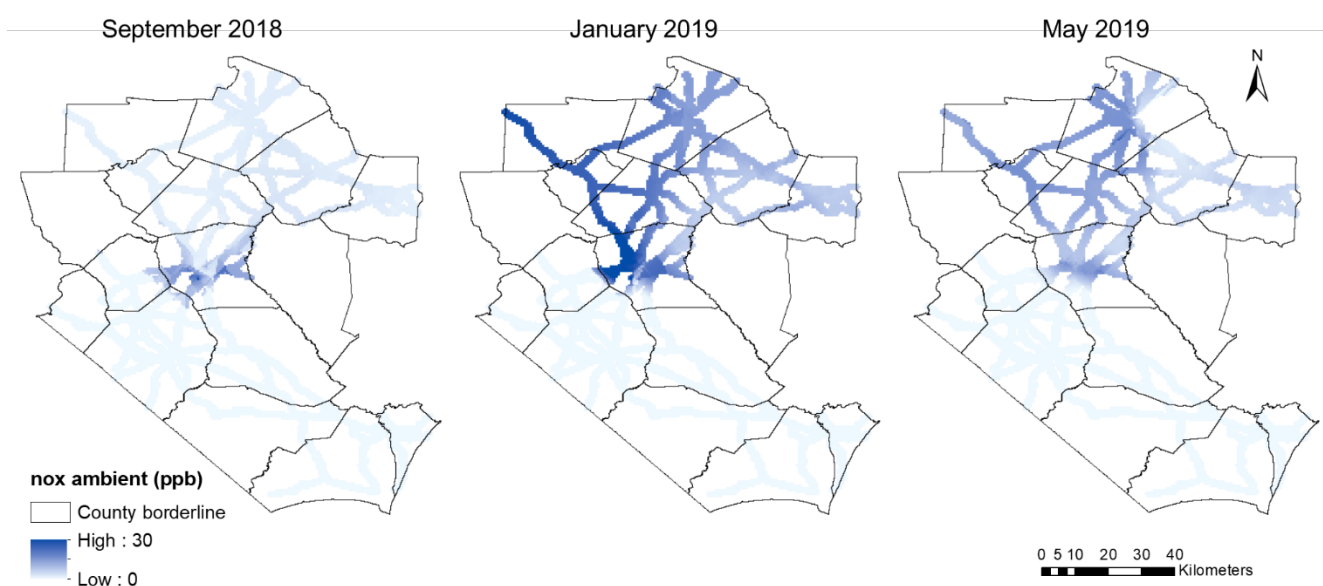

**Figure S8.** Spatial distribution of nitrogen oxides (NO<sub>x</sub>) for September 2018, January 2019 and May 2019.

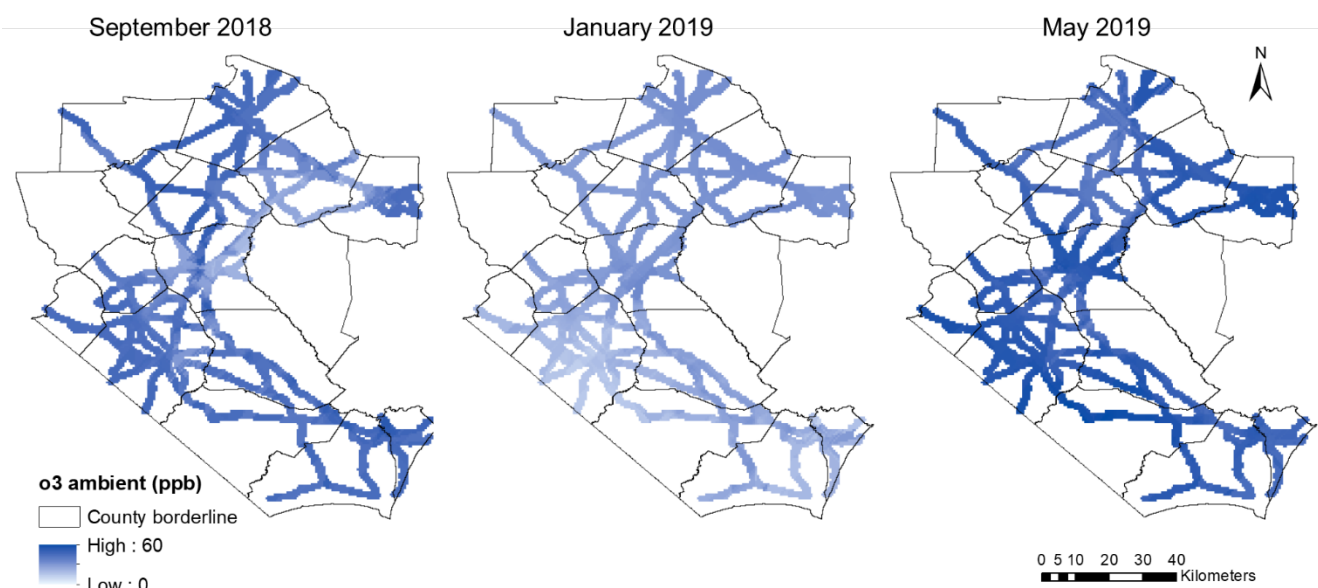

**Figure S9.** Spatial distribution of ozone (O<sub>3</sub>) for September 2018, January 2019 and May 2019.

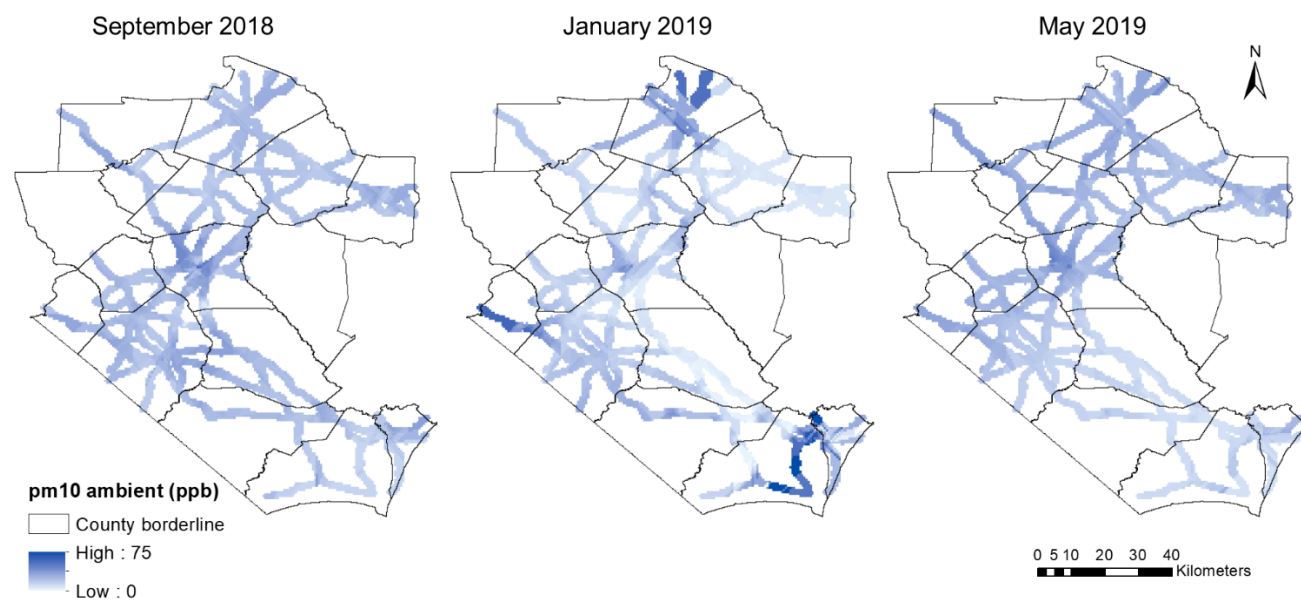

**Figure S10.** Spatial distribution of PM10 for September 2018, January 2019 and May 2019.

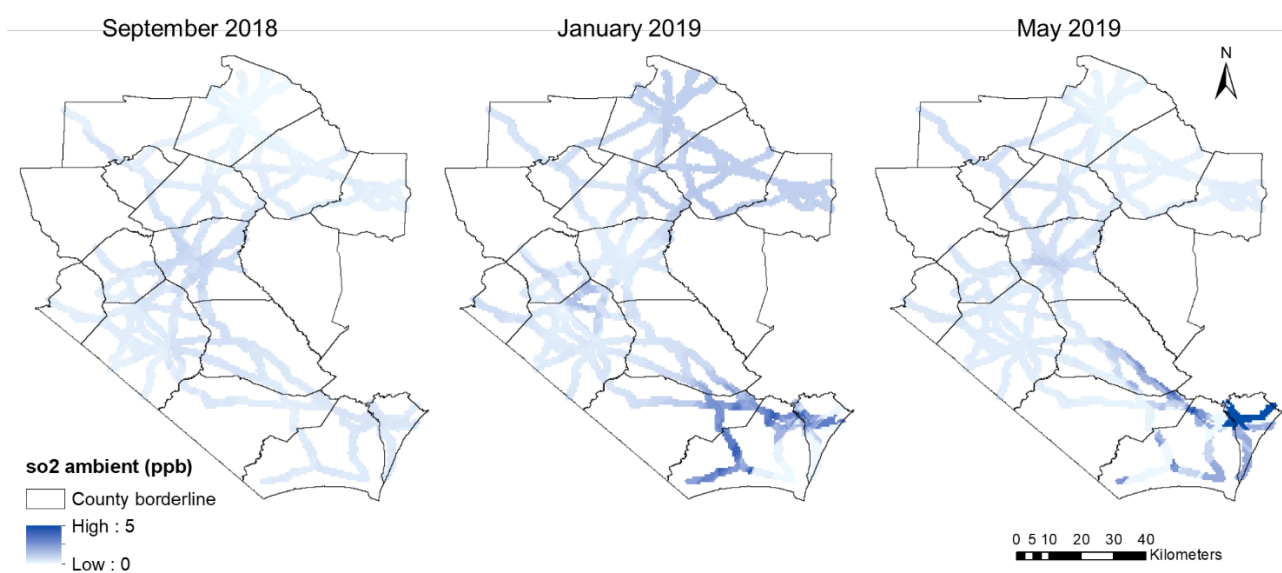

**Figure S11.** Spatial distribution of sulfur dioxide (SO<sub>2</sub>) for September 2018, January 2019 and May 2019.

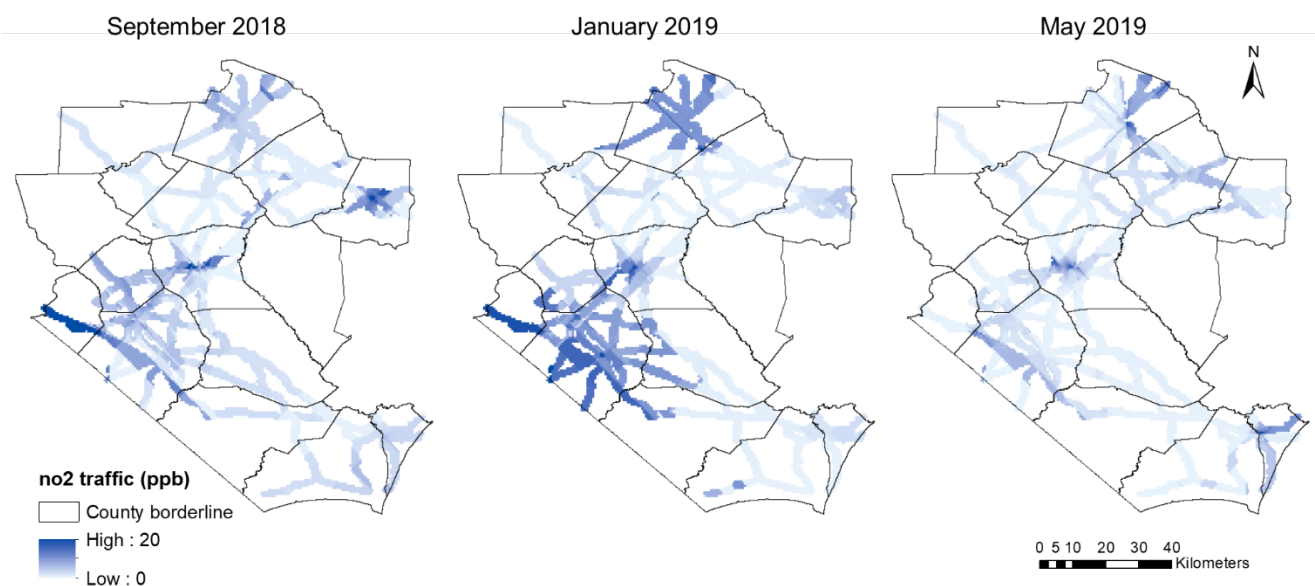

**Figure S12.** Spatial distribution of traffic-related nitrogen dioxide for September 2018, January 2019 and May 2019.

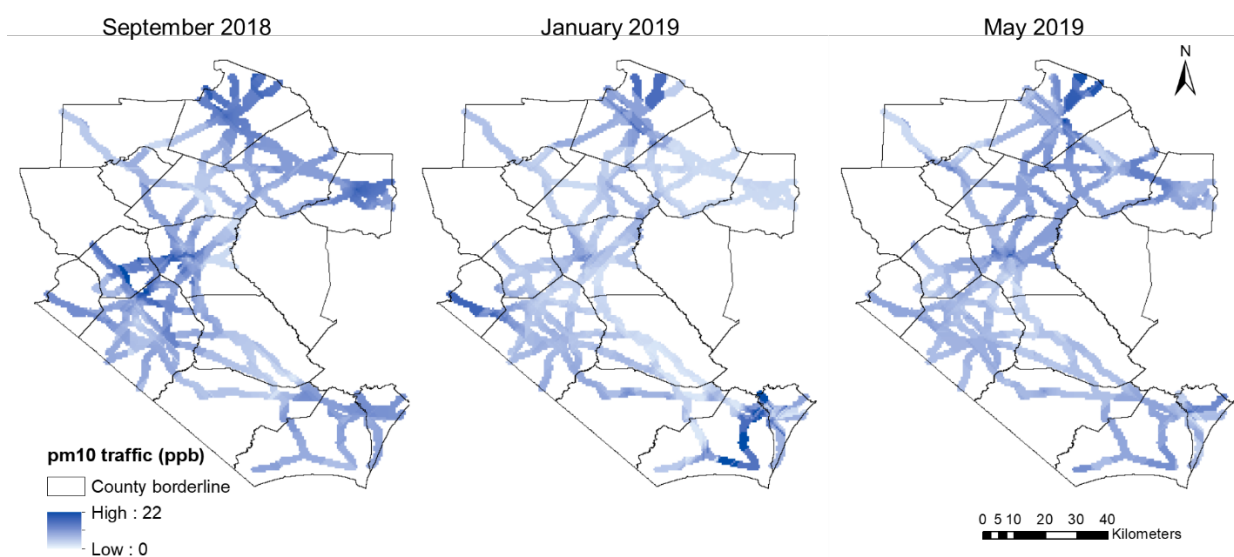

**Figure S13.** Spatial distribution of traffic-related PM10 for September 2018, January 2019 and May 2019.



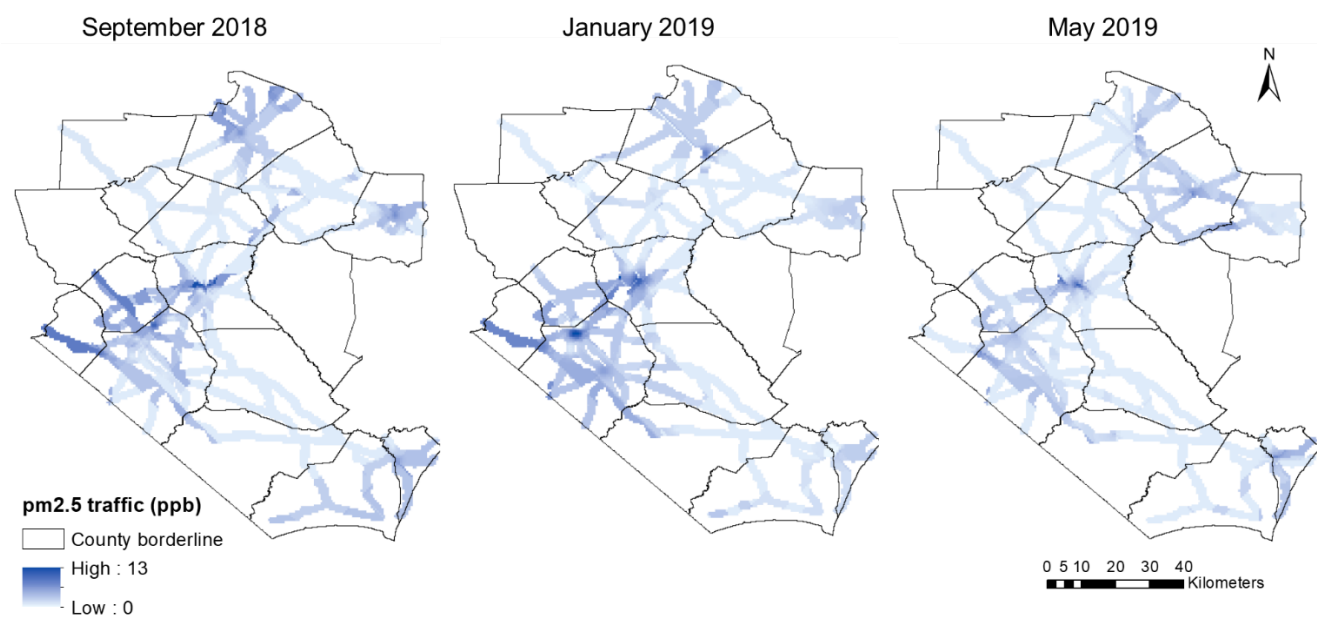

**Figure S14.** Spatial distribution of traffic-related PM<sub>2.5</sub> for September 2018, January 2019 and May 2019.

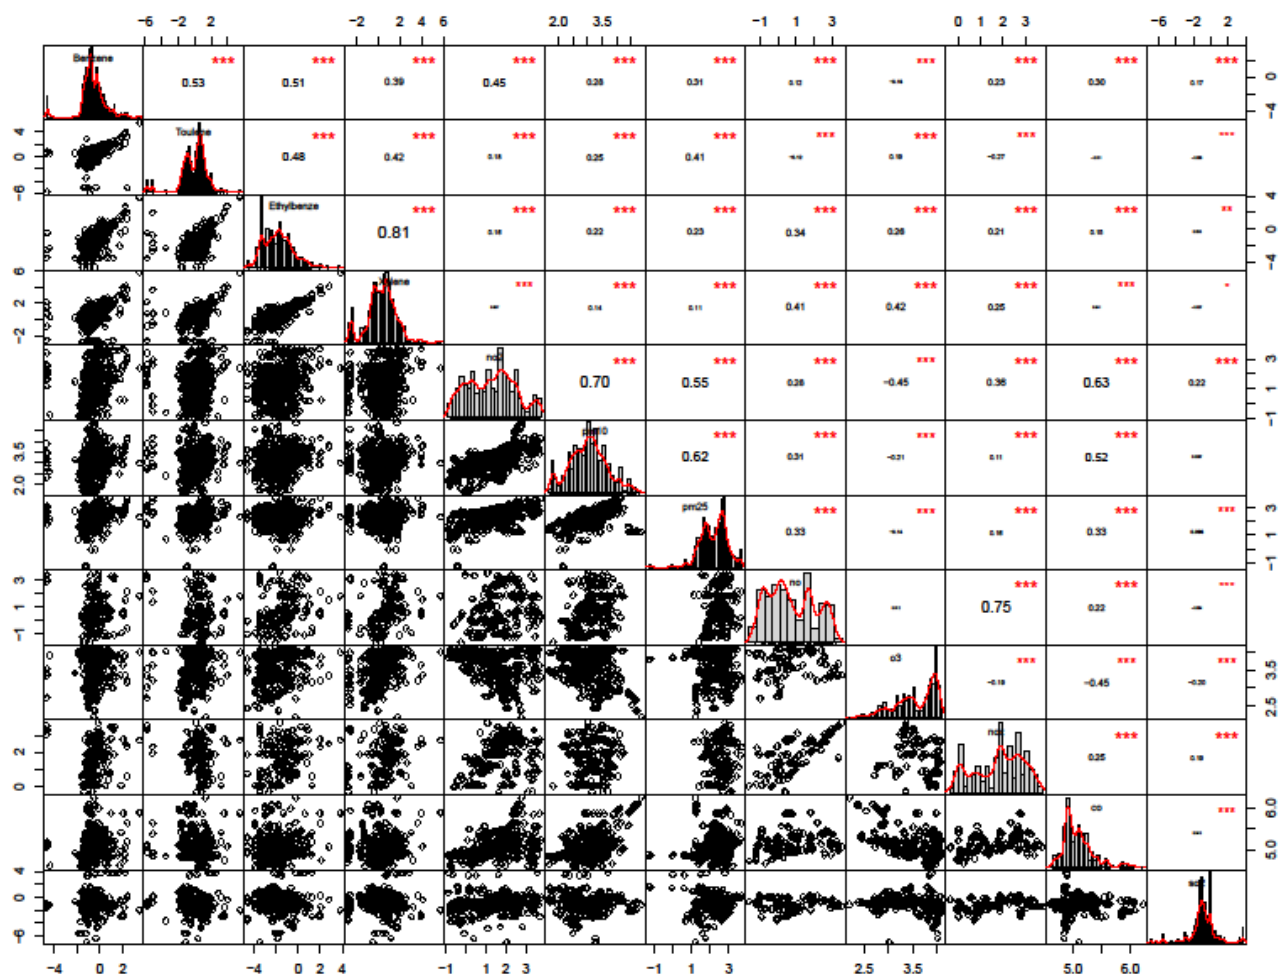

**Figure S15.** The scatter-matrix, and correlation matrix for measured BTEX with modeled NO<sub>2</sub>, PM<sub>10</sub>, PM<sub>25</sub>, NO, O<sub>3</sub>, NO<sub>x</sub>, CO, SO<sub>2</sub>.

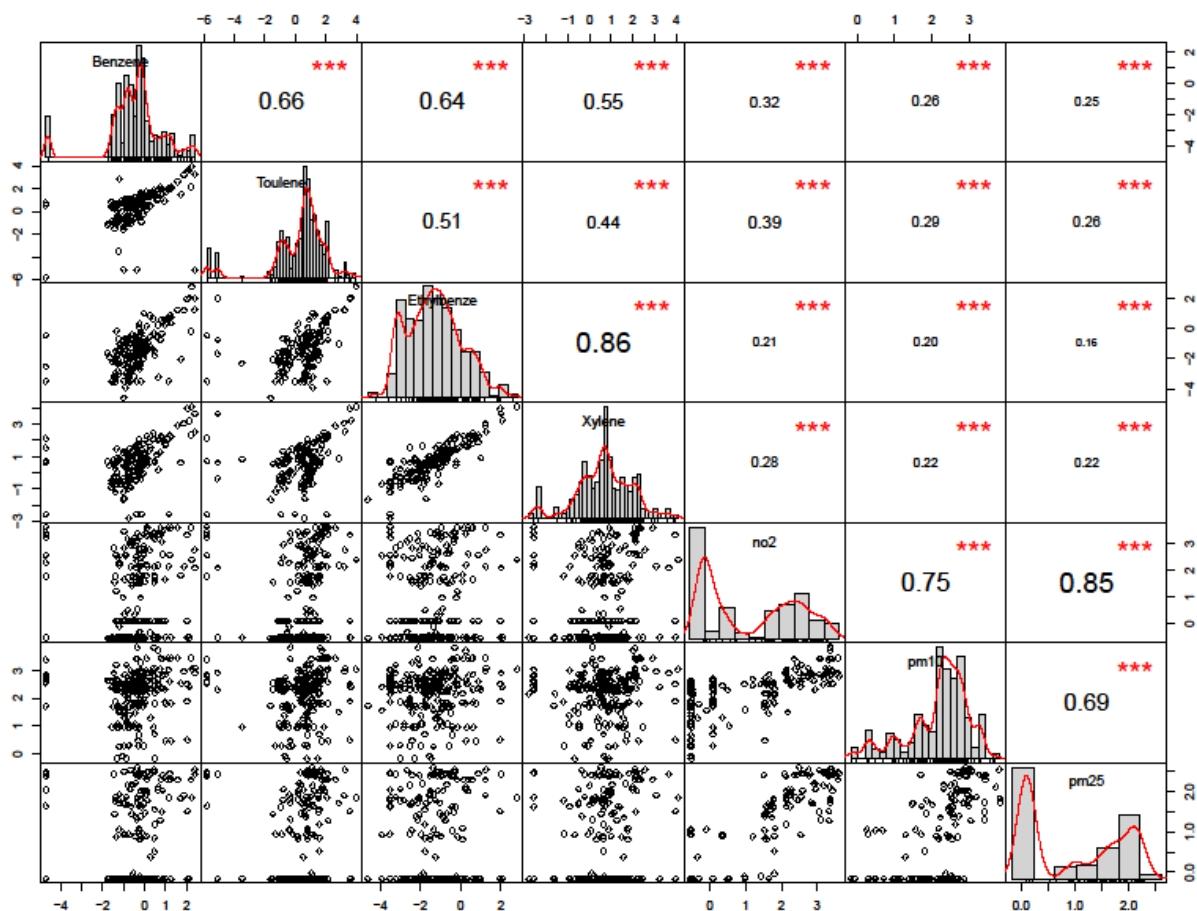

**Figure S16.** The scatter-matrix, and correlation matrix for measured BTEX with modeled traffic-related NO<sub>2</sub>, PM<sub>10</sub> and PM<sub>2.5</sub>.
